# Supplementary material for: The Impact of Substance Use Disorder on COVID-19 Outcomes
Source: Atypon-hosted journal article supplement (doi:10.1176/appi.ps.202000534), 2020-11-03
Supplement: appi.ps.202000534.ds001.pdf [file appi.ps.202000534.ds001.pdf]

| <b>Supplemental Table. Characteristics and Outcomes in Unmatched COVID-19 Cohorts, with and without Substance Use Disorder</b>                                 |                                                 |          |                                             |          |                      |               |
|----------------------------------------------------------------------------------------------------------------------------------------------------------------|-------------------------------------------------|----------|---------------------------------------------|----------|----------------------|---------------|
|                                                                                                                                                                | <b>No Substance Use Disorder<br/>N = 48,967</b> |          | <b>Substance Use Disorder<br/>N = 5,562</b> |          | <b>P<sup>a</sup></b> |               |
|                                                                                                                                                                | <b>N</b>                                        | <b>%</b> | <b>N</b>                                    | <b>%</b> |                      |               |
| <b>Age (mean, SD)</b>                                                                                                                                          | 49.5                                            | 18.9     | 54.0                                        | 17.2     | <.0001               |               |
| <b>Gender</b>                                                                                                                                                  |                                                 |          |                                             |          | <.0001               |               |
| Female                                                                                                                                                         | 28,468                                          | 58.1     | 2,623                                       | 47.2     |                      |               |
| Male                                                                                                                                                           | 19,988                                          | 40.8     | 2,938                                       | 52.8     |                      |               |
| <b>Race</b>                                                                                                                                                    |                                                 |          |                                             |          | <.0001               |               |
| White                                                                                                                                                          | 24,483                                          | 50.0     | 3,116                                       | 56.0     |                      |               |
| Black                                                                                                                                                          | 13,301                                          | 27.2     | 1,728                                       | 31.1     |                      |               |
| Asian                                                                                                                                                          | 1,417                                           | 2.9      | 72                                          | 1.3      |                      |               |
| Unknown/ Other                                                                                                                                                 | 9,766                                           | 19.9     | 646                                         | 11.6     |                      |               |
| <b>Ethnicity</b>                                                                                                                                               |                                                 |          |                                             |          | <.0001               |               |
| Hispanic                                                                                                                                                       | 7612                                            | 15.6     | 629                                         | 11.3     |                      |               |
| Not Hispanic                                                                                                                                                   | 23,556                                          | 48.1     | 3,565                                       | 64.1     |                      |               |
| Unknown                                                                                                                                                        | 17,799                                          | 36.4     | 1,368                                       | 24.6     |                      |               |
| <b>Comorbidities</b>                                                                                                                                           |                                                 |          |                                             |          |                      |               |
| Diabetes                                                                                                                                                       | 7,258                                           | 14.8     | 1,675                                       | 30.1     | <.0001               |               |
| Hypertension                                                                                                                                                   | 13,981                                          | 28.6     | 3,089                                       | 55.5     | <.0001               |               |
| COPD                                                                                                                                                           | 1,506                                           | 3.1      | 1,085                                       | 19.5     | <.0001               |               |
| Ischemic heart dis                                                                                                                                             | 3,651                                           | 7.5      | 1,383                                       | 24.9     | <.0001               |               |
| Obesity                                                                                                                                                        | 8,715                                           | 17.8     | 1,864                                       | 33.5     | <.0001               |               |
| Cerebrovasc dis                                                                                                                                                | 2,667                                           | 5.5      | 851                                         | 15.3     | <.0001               |               |
| <b>Outcomes (3 weeks)</b>                                                                                                                                      |                                                 |          |                                             |          |                      |               |
|                                                                                                                                                                | <b>N</b>                                        | <b>%</b> | <b>N</b>                                    | <b>%</b> | <b>OR</b>            | <b>95% CI</b> |
| Hospitalization                                                                                                                                                | 8,497                                           | 17.35    | 1808                                        | 32.51    | 2.29                 | 2.16, 2.44    |
| Ventilator use                                                                                                                                                 | 1503                                            | 3.07     | 334                                         | 6.01     | 2.02                 | 1.79, 2.28    |
| Death                                                                                                                                                          | 1,342                                           | 2.74     | 270                                         | 4.85     | 1.81                 | 1.58, 2.07    |
| a Baseline characteristics were compared using a Pearson chi-square test for categorical variables and an independent-samples t-test for continuous variables. |                                                 |          |                                             |          |                      |               |
